# Supplementary material for: Tetramethylurea dimer/lithium salt-based deep eutectics as a novel class of eutectic electrolytes
Source: Royal Society of Chemistry journal article supplement (doi:10.1039/d1qm01174j), 2021-01-01
Supplement: d1qm01174j1.pdf [file d1qm01174j1.pdf]

## Supporting Information

# Tetramethylurea Dimer/Lithium Salt-Based Deep Eutectics as a Novel Class of Eutectic Electrolytes

*Hideyuki Ogawa,<sup>†‡</sup> Yugo Sato,<sup>†</sup> Hideharu Mori<sup>†\*</sup>*

<sup>†</sup> Department of Organic Materials Science, Graduate School of Organic Materials Science, Yamagata University, 4-3-16, Jonan, Yonezawa City, Yamagata Prefecture 992-8510, Japan

<sup>‡</sup> Showa Denko Materials Co., Ltd., 48, Wadai, Tsukuba City, Ibaraki Prefecture 300-4247, Japan

\* To whom correspondence should be addressed. e-mail: [h.mori@yz.yamagata-u.ac.jp](mailto:h.mori@yz.yamagata-u.ac.jp)

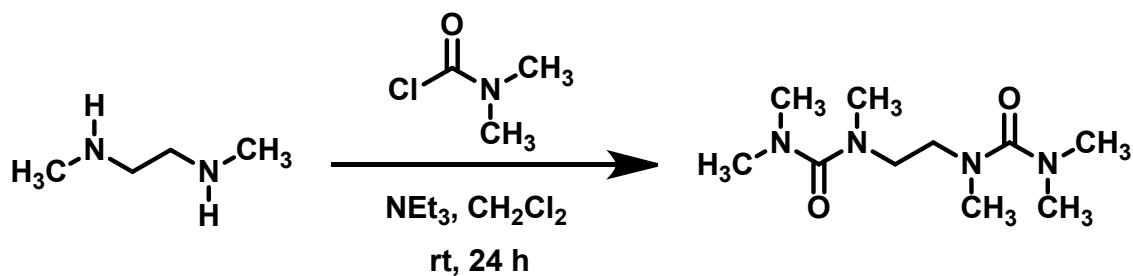

**Scheme 1.** Synthesis of tetramethylurea (TMU) dimer.

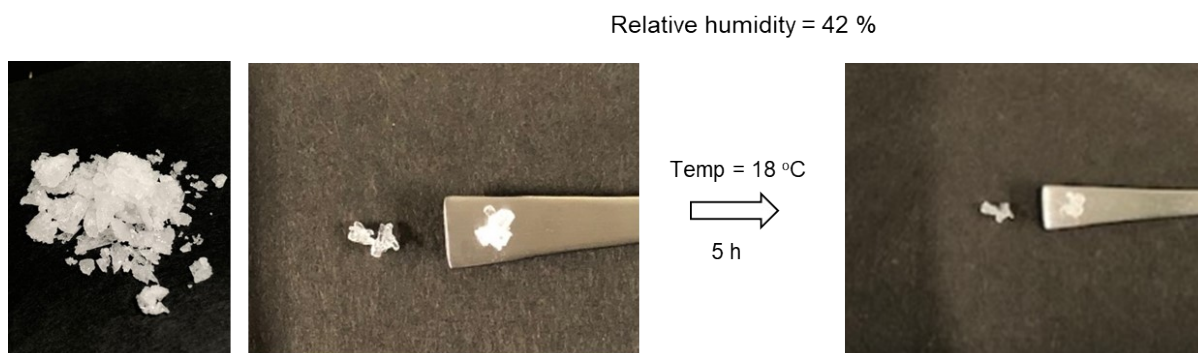

**Figure S1.** Photographs of DMU dimer obtained after the recrystallization and after leaving to stand for 5 h under a humid condition.

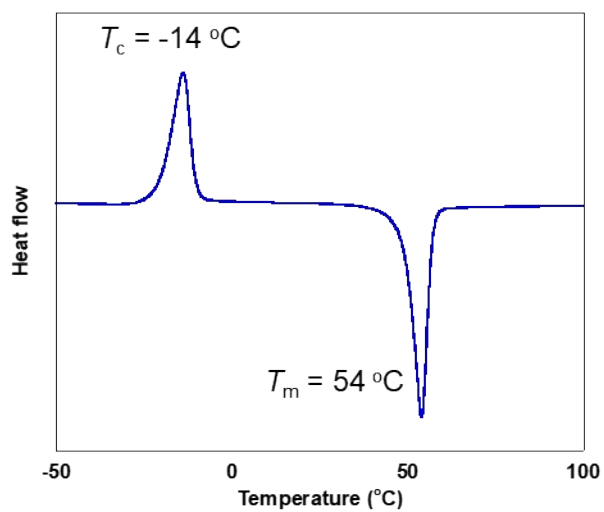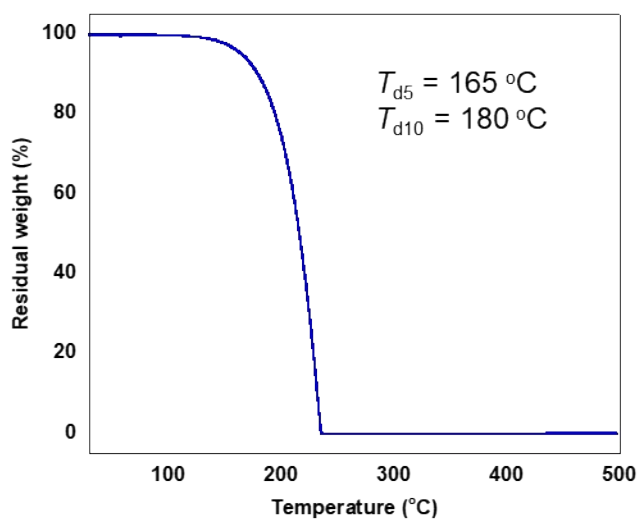

**Figure S2.** DSC (top) and TGA (bottom) traces of TMU dimer.

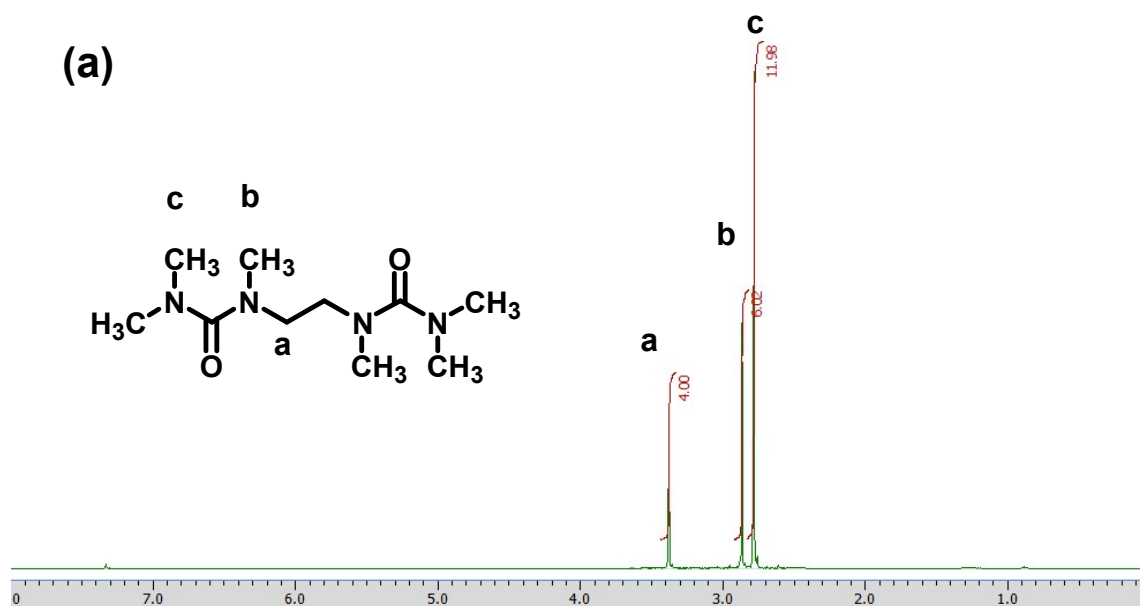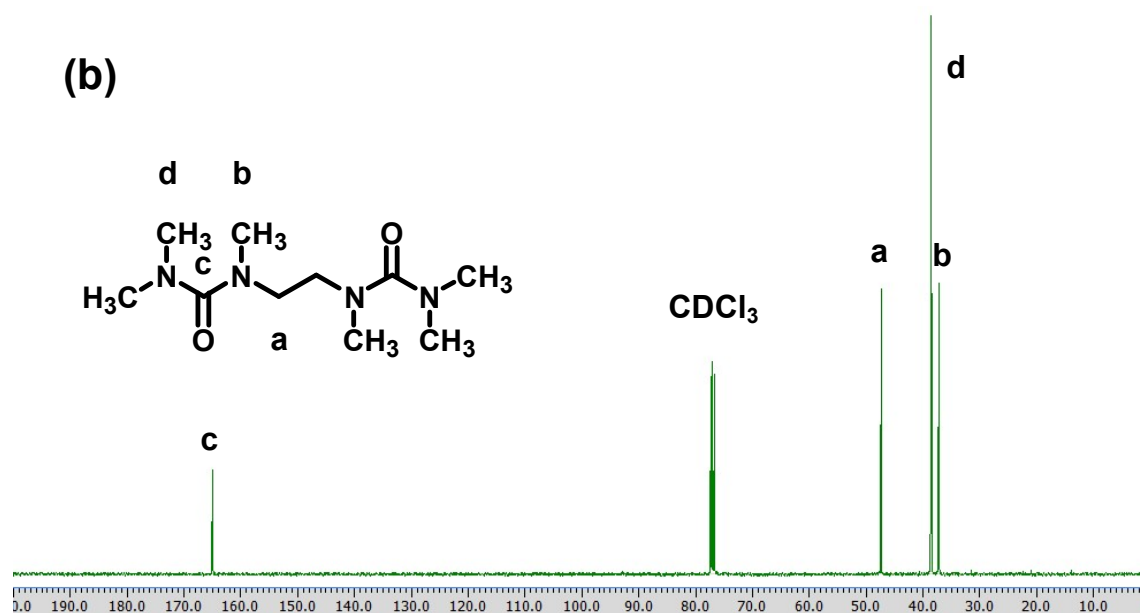

Figure S3. (a)  $^1\text{H}$  NMR and (b)  $^{13}\text{C}$  NMR spectra of DMU dimer in  $\text{CDCl}_3$ .

**Table S1.** Solubility test of DMU dimer <sup>a)</sup>

|       |        |         |              |                   |                                 |         |                  |
|-------|--------|---------|--------------|-------------------|---------------------------------|---------|------------------|
|       | Hexane | Toluene | Diethylether | CHCl <sub>3</sub> | CH <sub>2</sub> Cl <sub>2</sub> | Acetone | THF              |
| Dimer | -      | +       | +            | +                 | +                               | +       | +                |
|       | AcOEt  | MeOH    | EtOH         | dioxane           | DMSO                            | DMF     | H <sub>2</sub> O |
| Dimer | +      | +       | + -          | +                 | +                               | +       | +                |

<sup>a)</sup> + : soluble at r.t. + - : soluble at 60°C - : insoluble at r.t. conc. = 0.3-1.0 mg/mL.

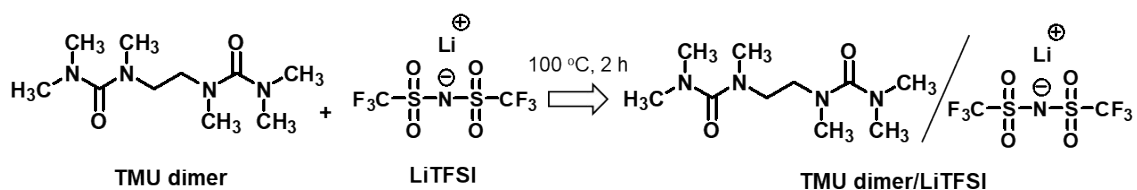

|           |                                                                                     | DMU dimer:LiTFSI                                                                    |                                                                                      |                                                                                       |              |
|-----------|-------------------------------------------------------------------------------------|-------------------------------------------------------------------------------------|--------------------------------------------------------------------------------------|---------------------------------------------------------------------------------------|--------------|
|           |                                                                                     | 10 : 1                                                                              | 5 : 1                                                                                | 3 : 1                                                                                 | 1 : 1        |
| 100<br>°C | 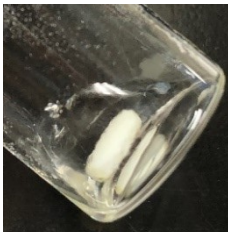  |   |   |   |              |
|           |                                                                                     | Liquid                                                                              | Liquid                                                                               | Liquid+Solid                                                                          | Liquid+Solid |
| r.t.      |  |  |  |  |              |
|           |                                                                                     | Liquid                                                                              | Liquid                                                                               | Solid                                                                                 | Solid        |

**Figure S4.** Synthetic pathway (top) and photographs (bottom) of TMU dimer/LiTFSI obtained at different feed ratios (dimer/LiTFSI = 10:1-1:1) after heating at 100 °C for 2 h and after leaving to stand at room temperature (25 °C or less) for 12 h.

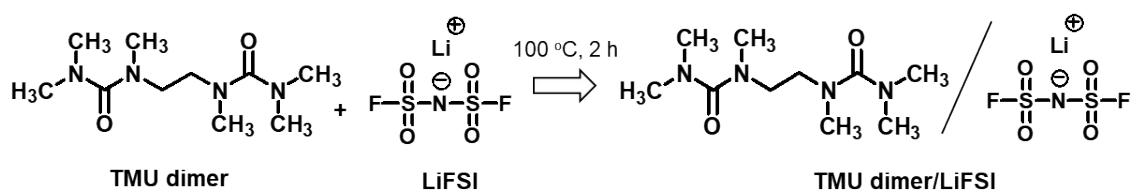

|           |  | DMU dimer:LiFSI |        |              |              |
|-----------|--|-----------------|--------|--------------|--------------|
|           |  | 10 : 1          | 5 : 1  | 3 : 1        | 1 : 1        |
| 100<br>°C |  |                 |        |              |              |
|           |  | Liquid          | Liquid | Liquid+Solid | Liquid+Solid |
| r.t.      |  |                 |        |              |              |
|           |  | Liquid          | Liquid | Solid        | Solid        |

**Figure S5.** Synthetic pathway (top) and photographs (bottom) of TMU dimer/LiFSI obtained at different feed ratios (dimer/LiFSI = 10:1-1:1) after heating at 100 °C for 2 h and after leaving to stand at room temperature (25 °C or less) for 12 h.

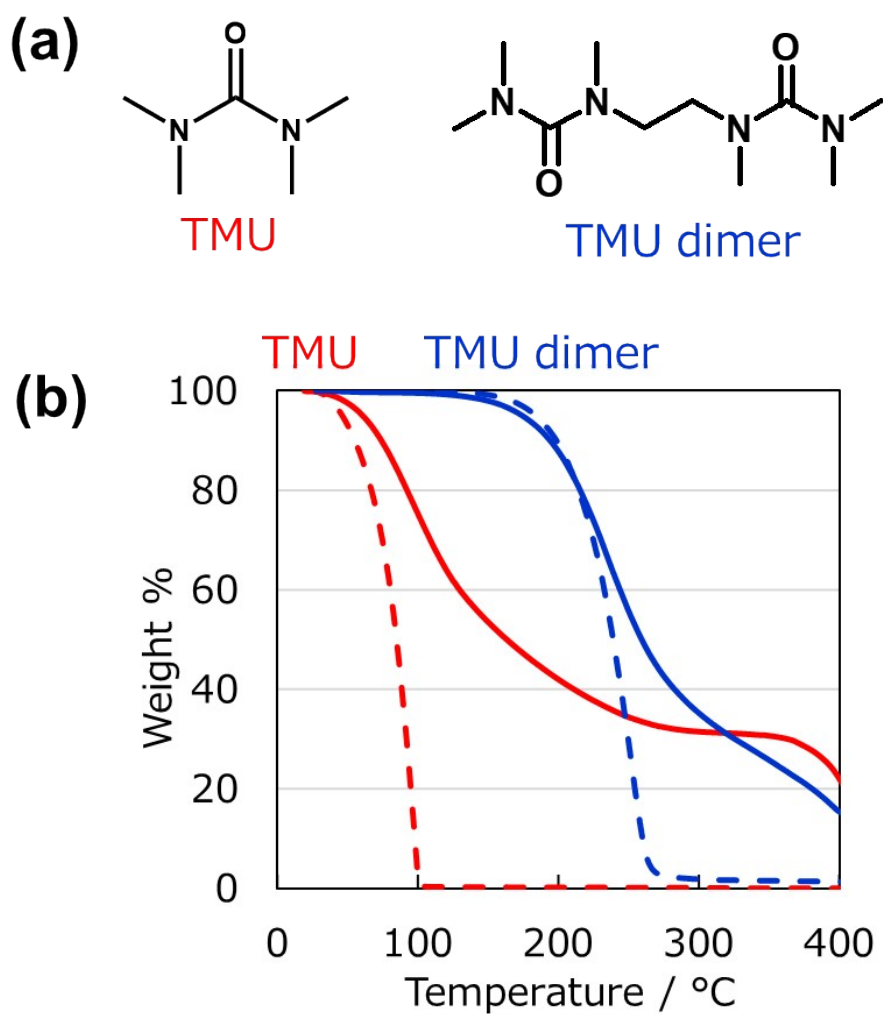

**Figure S6.** (a) Structures of TMU (tetramethylurea) and TMU dimer and (b) TGA traces of DMU (red dotted line) and DMU dimer (blue dotted line) and their mixture with LiTFSI (solid line) prepared at DMU (or dimer)/LiTFSI of 5:1 at 100 °C for 2 h.



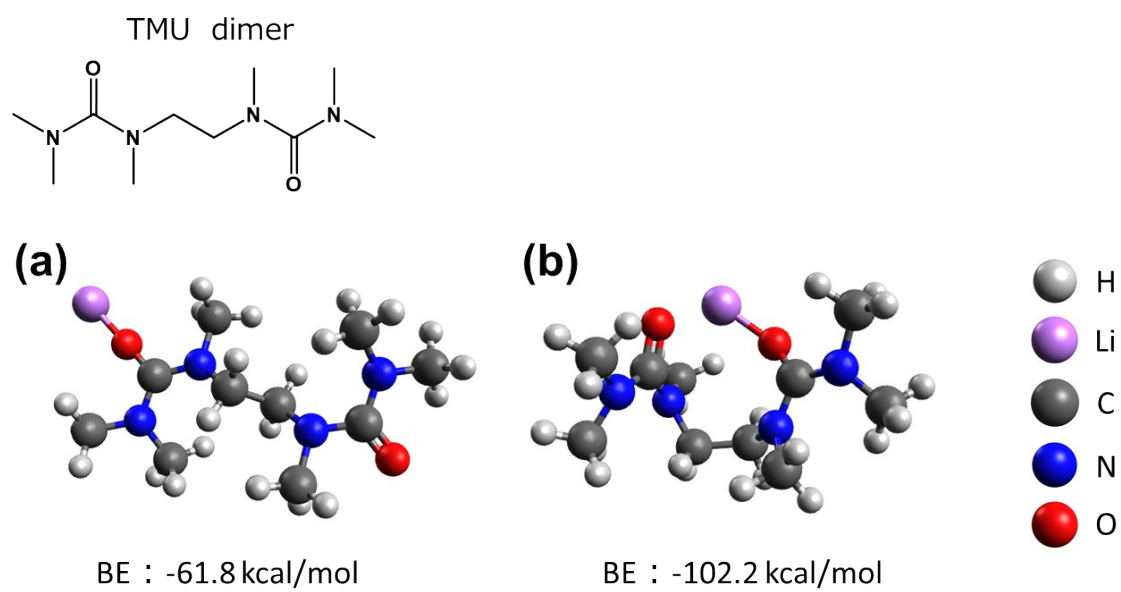

**Figure S7.** Typical coordination diagrams of  $\text{Li}^+$ /TMU dimer: one  $\text{Li}^+$  was interacted with (a) one amido ( $\text{C}=\text{O}$ ) and (b) two amide ( $\text{C}=\text{O}$ ) units, respectively.
